# Supplementary material
Source: PubMed Central journal article supplement (PMC3761943)

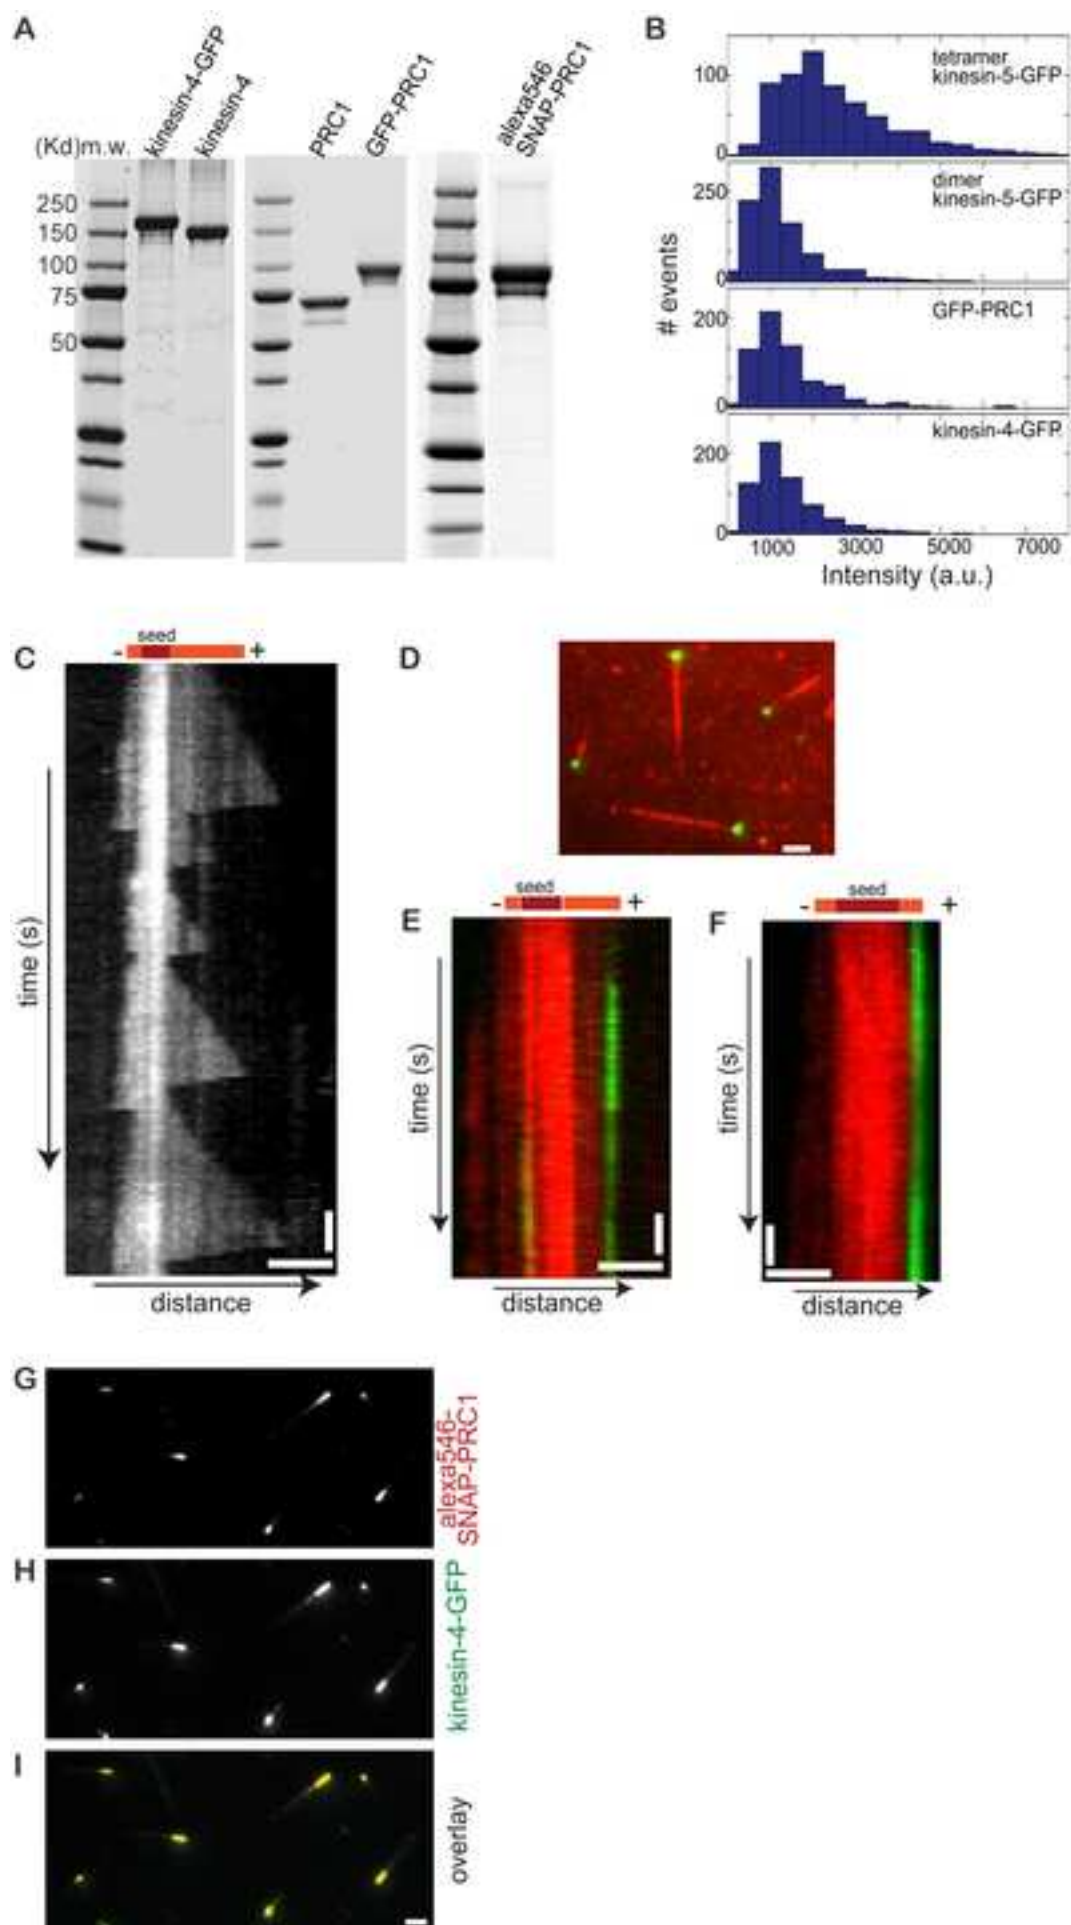

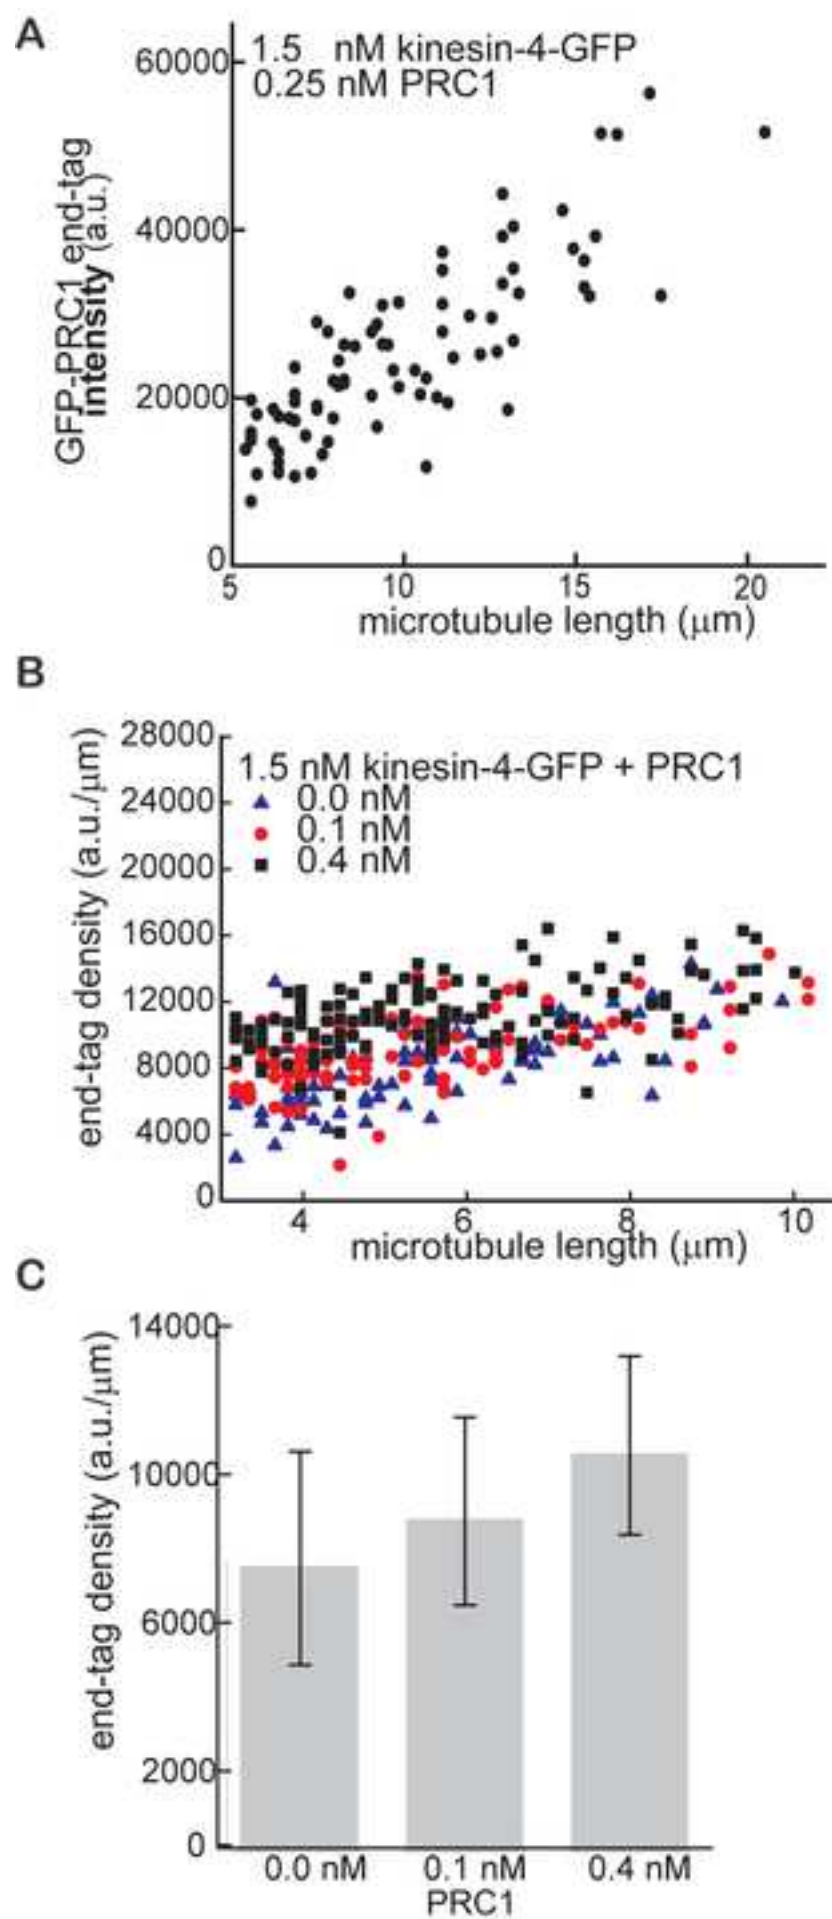

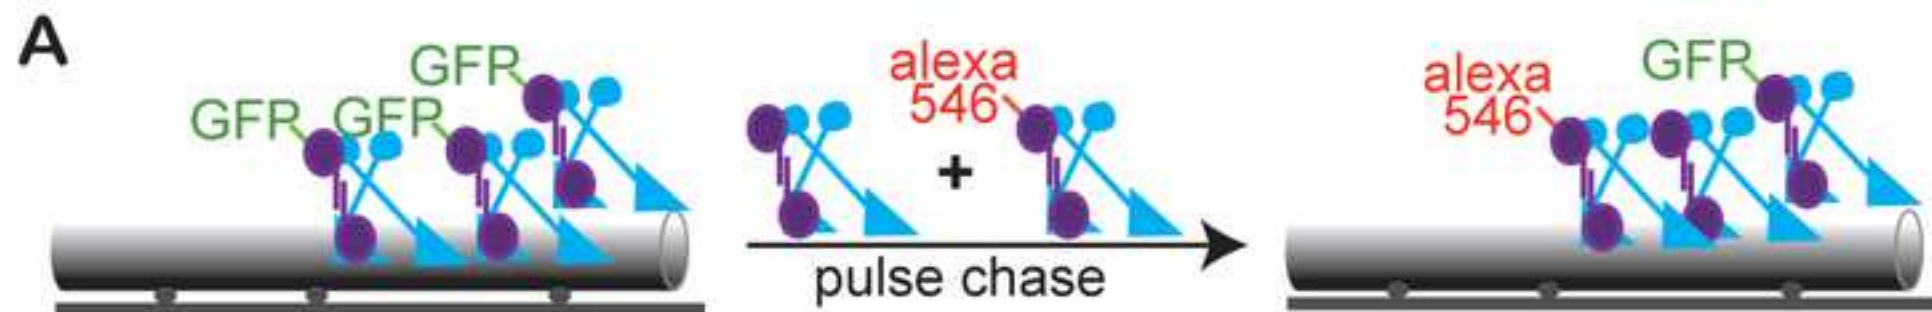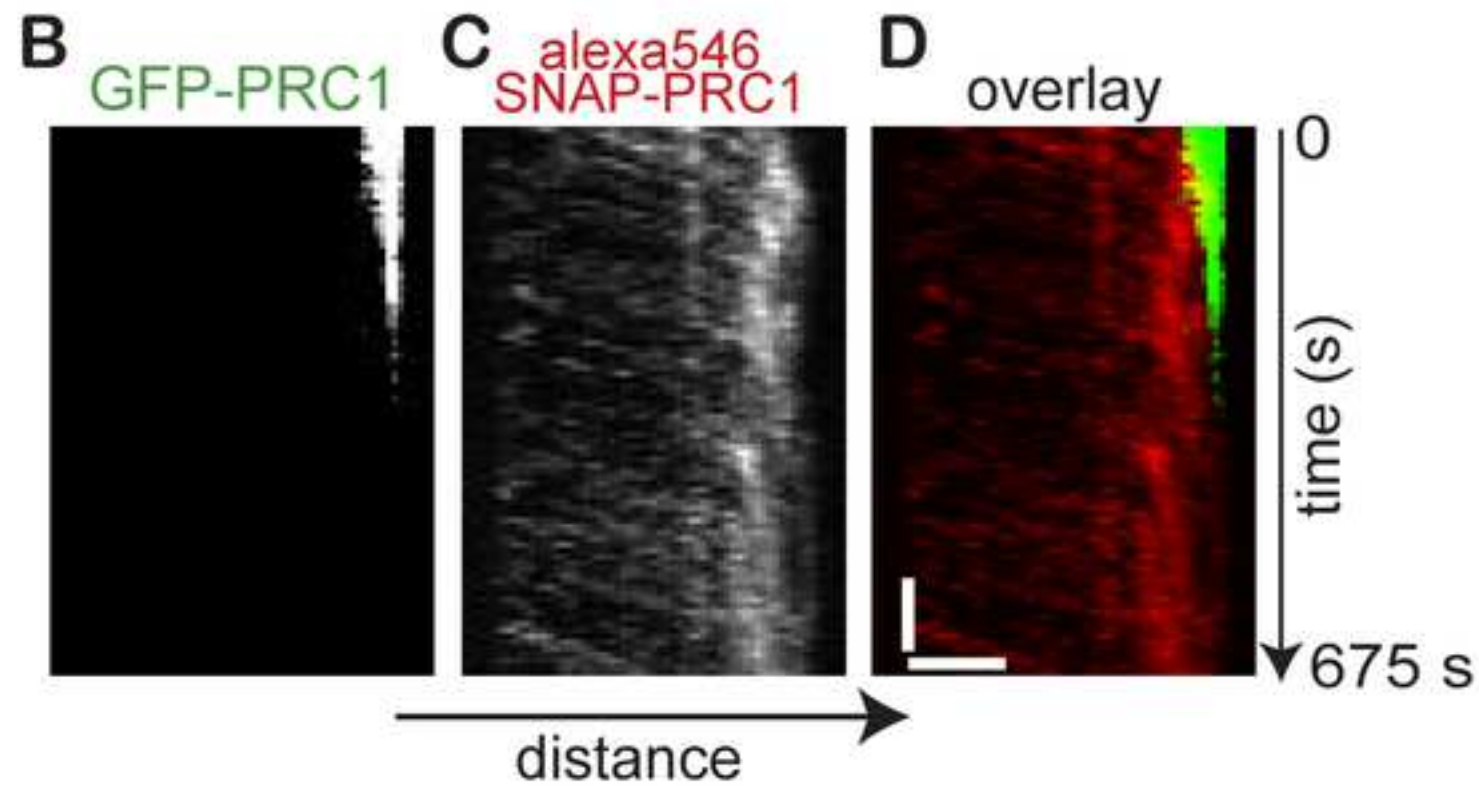

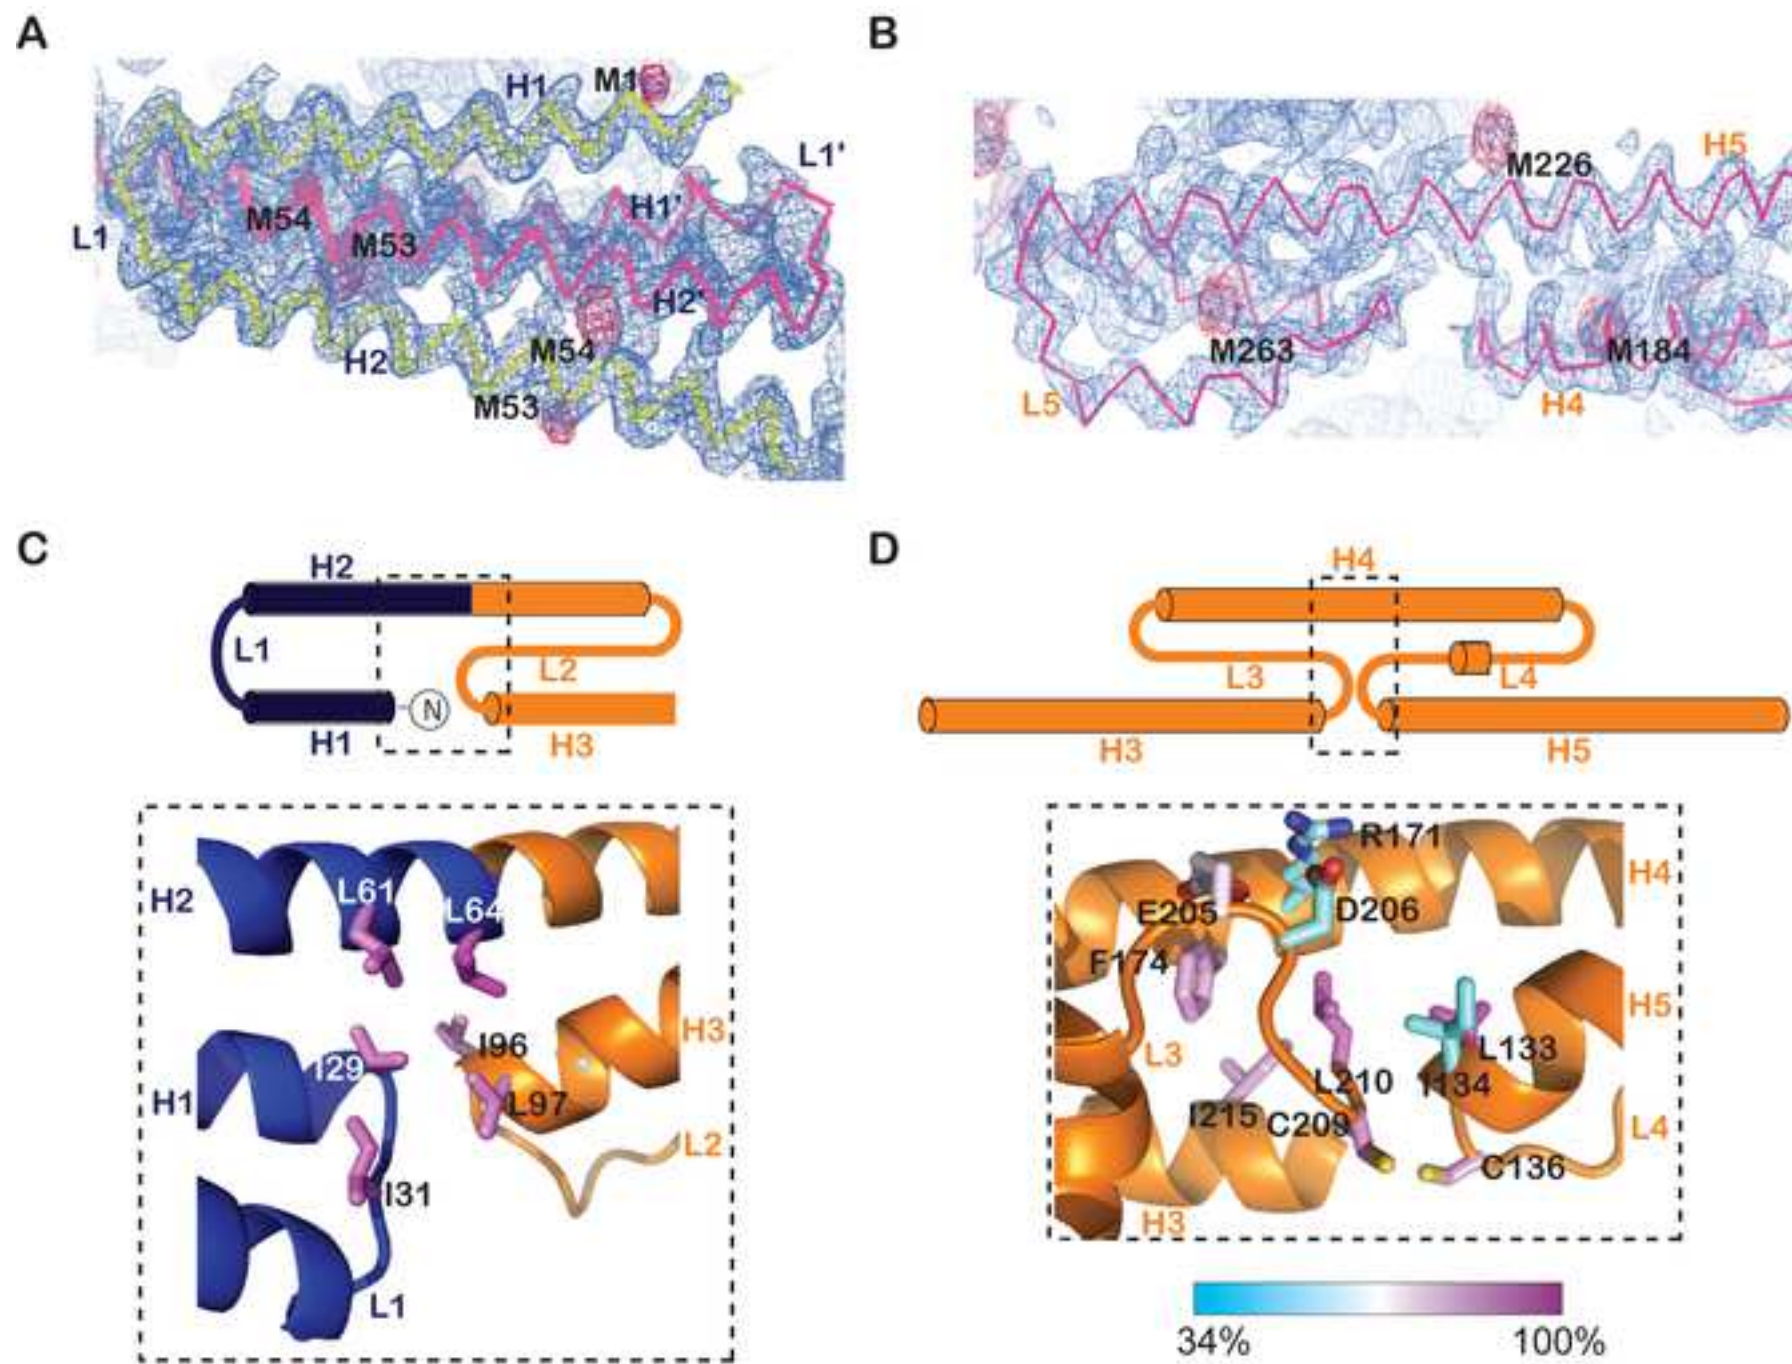

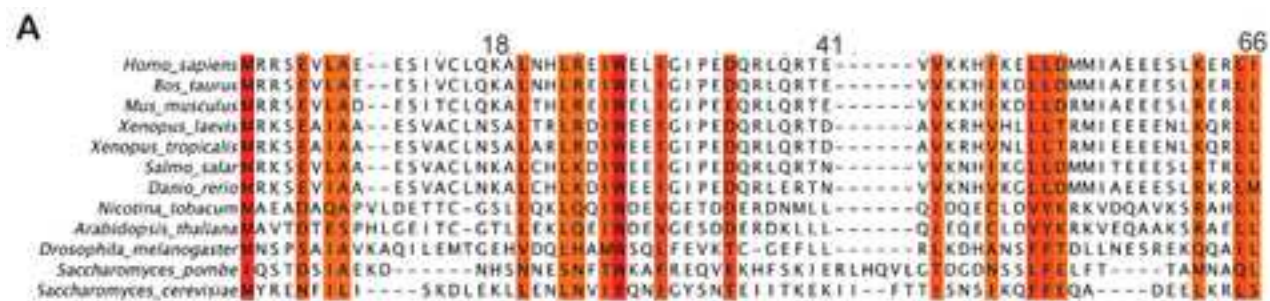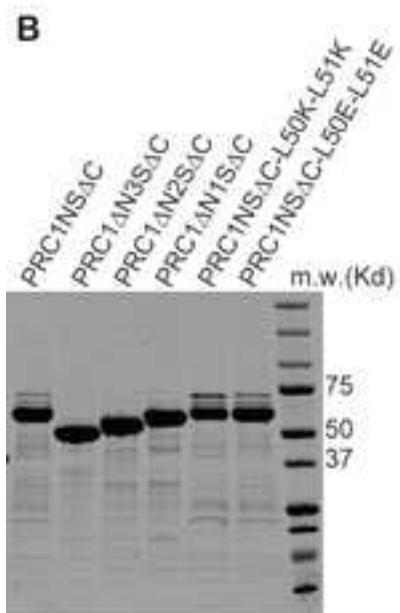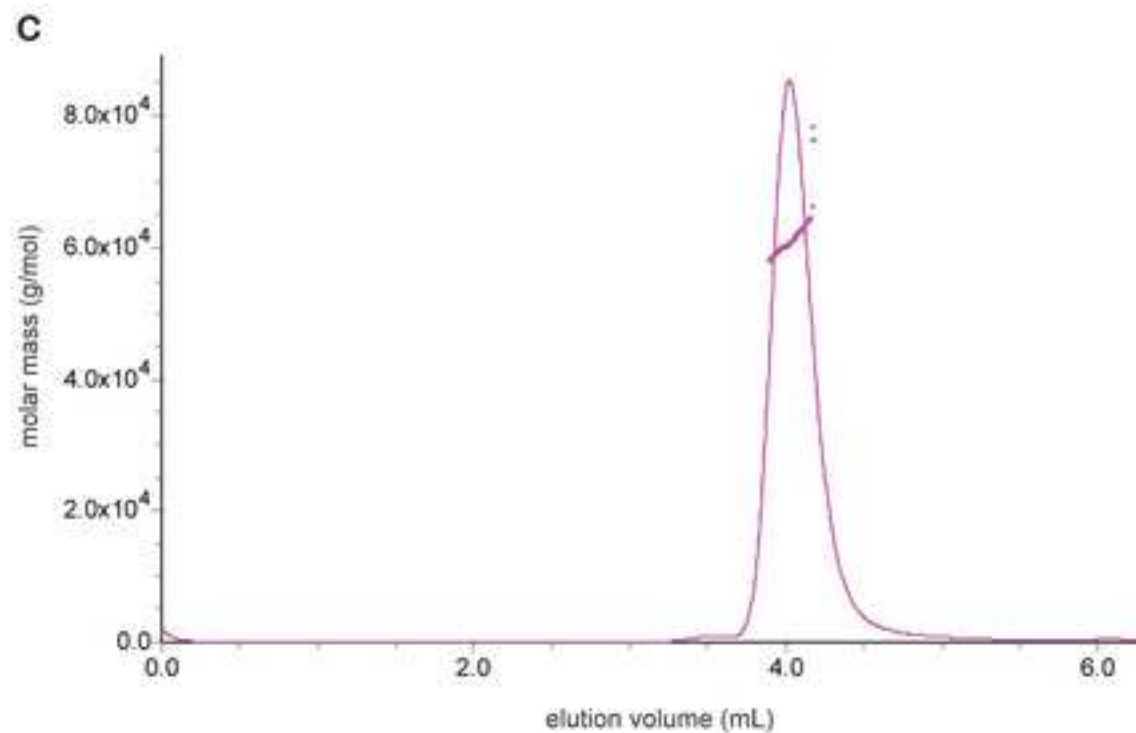

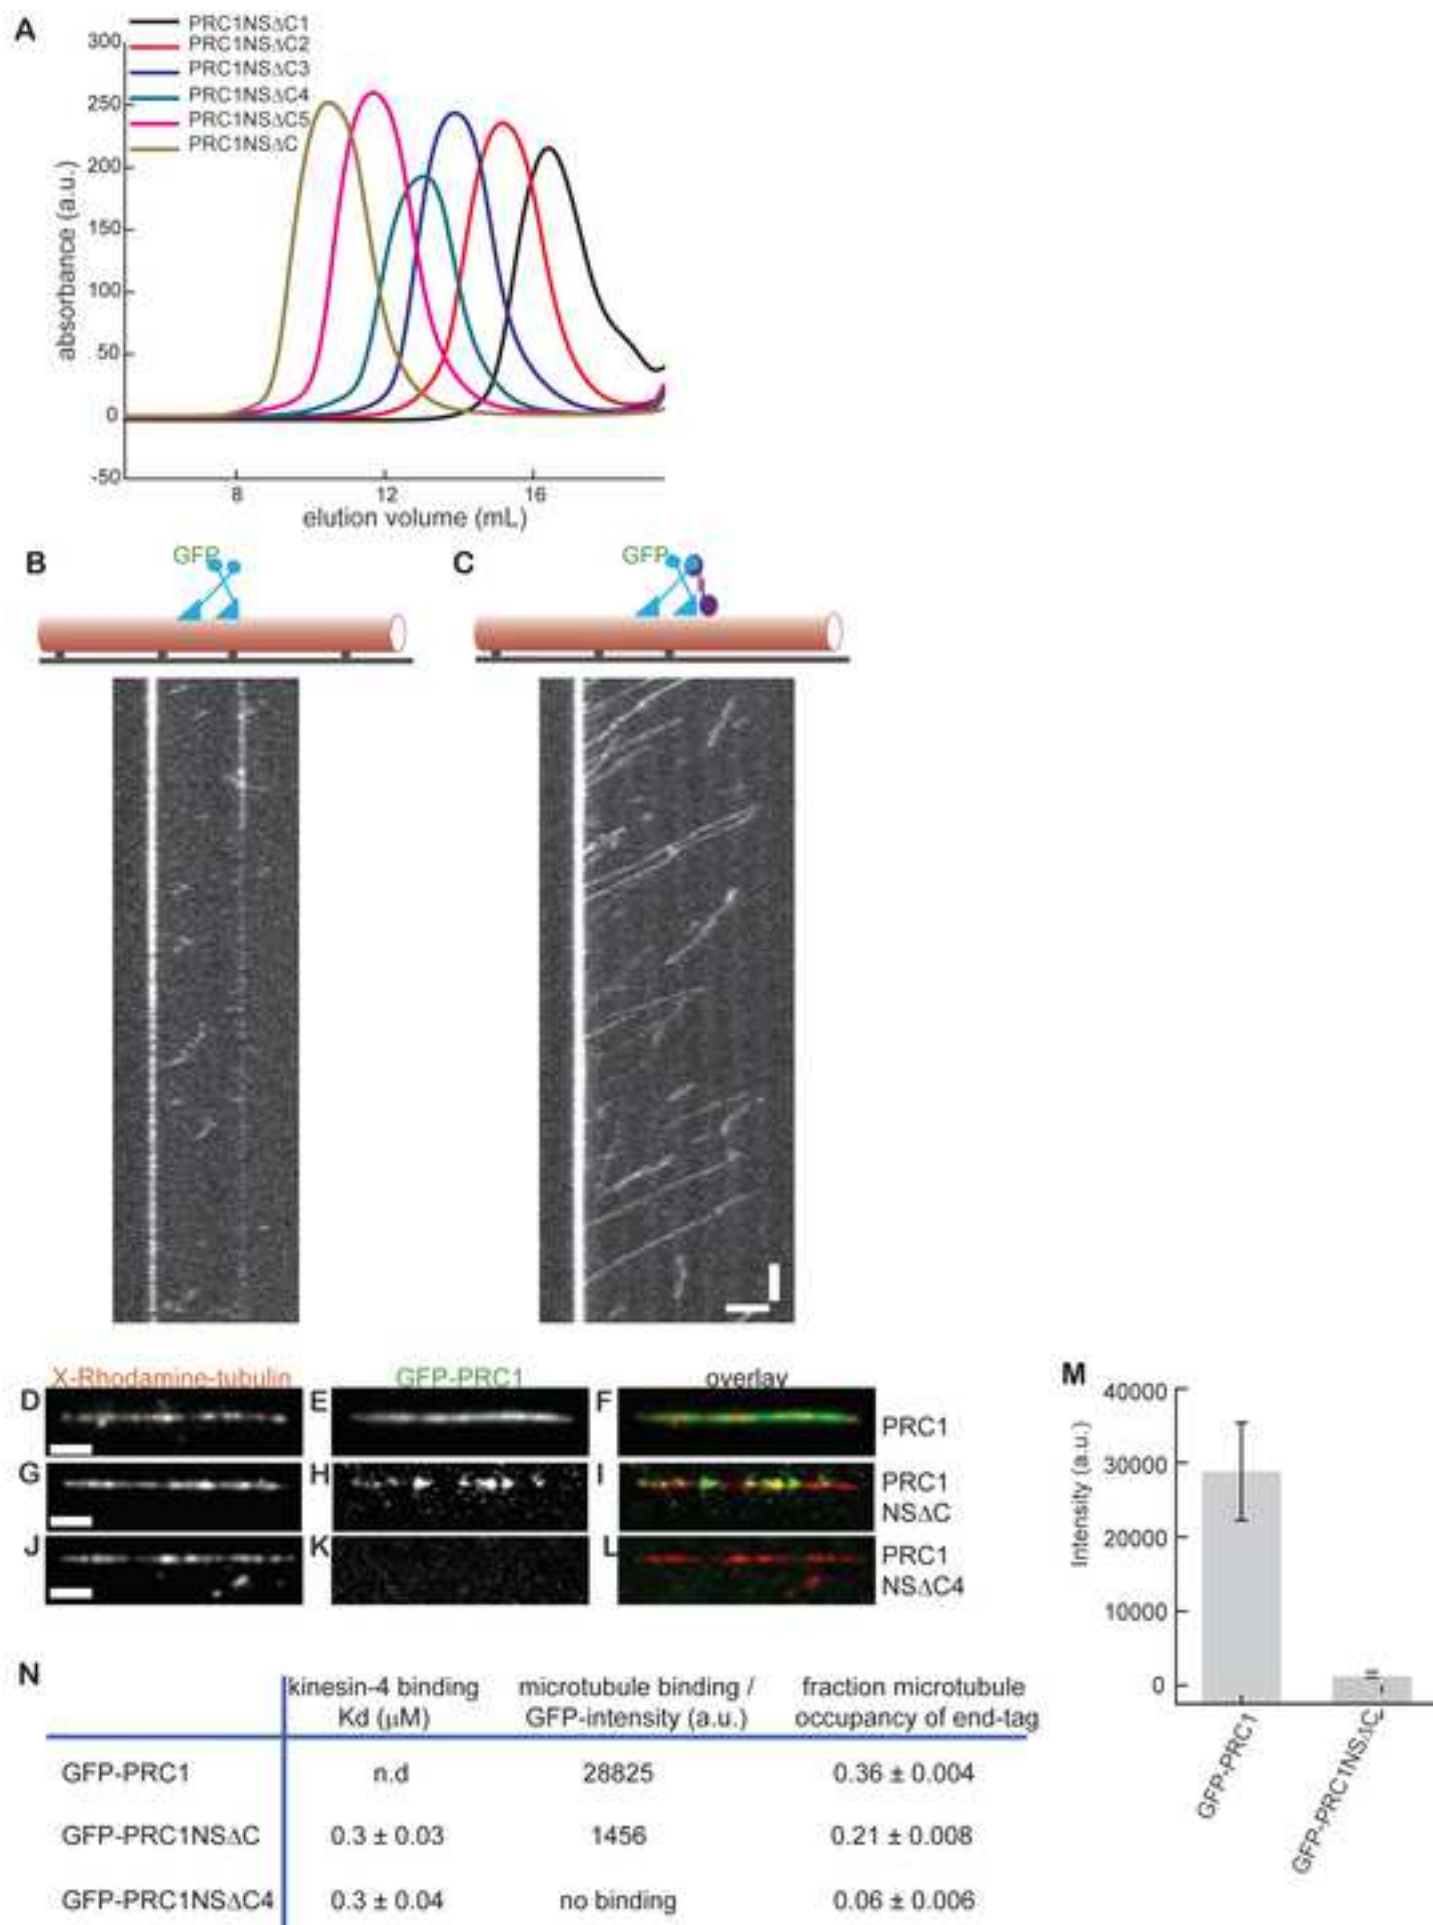

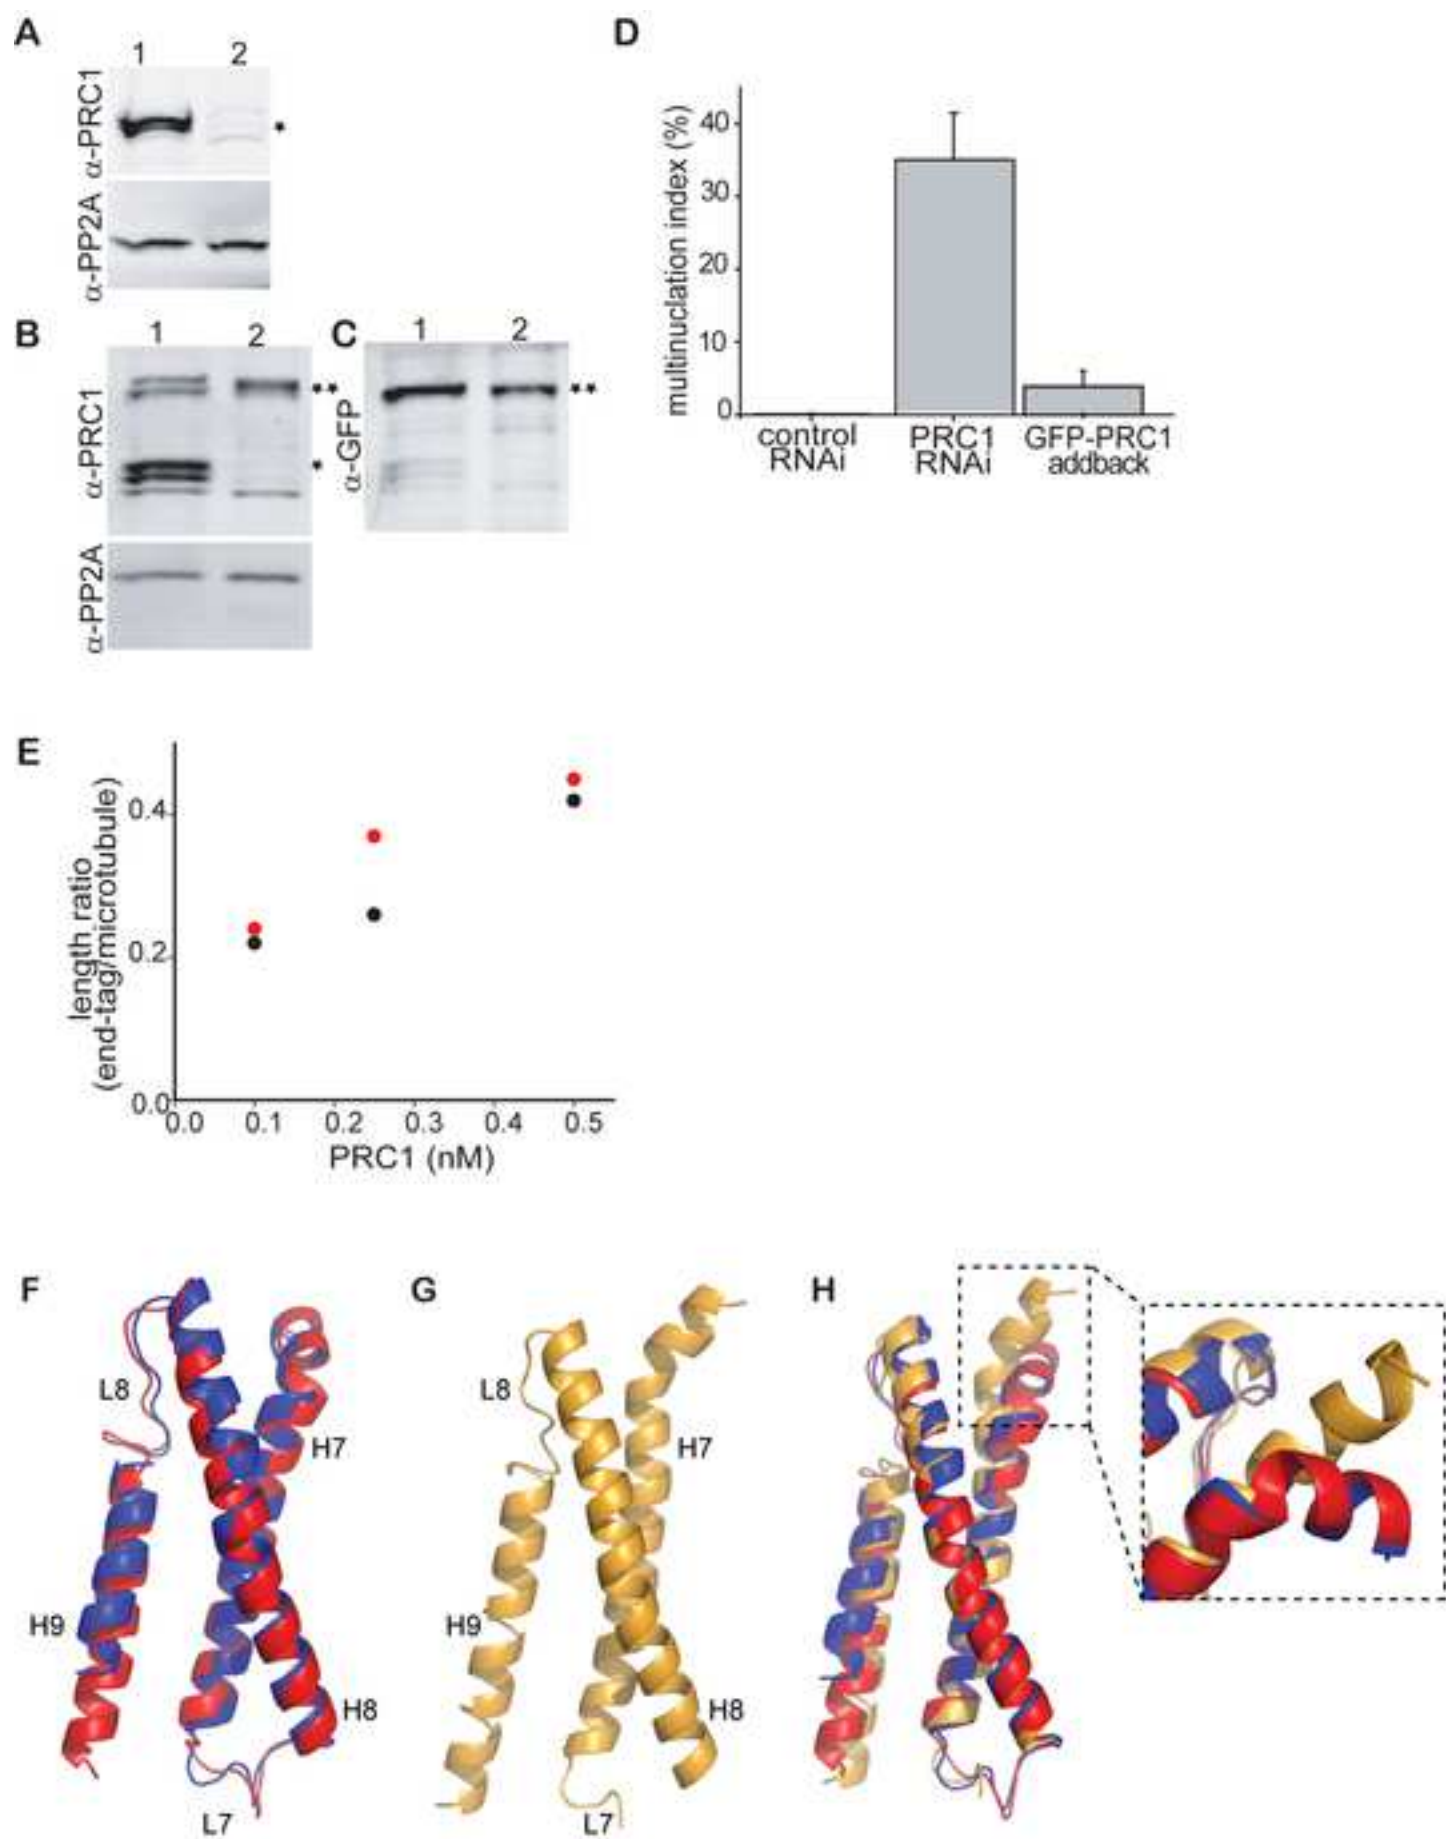

Supplement: NIHMS498370-supplement-02.pdf [file NIHMS498370-supplement-02.pdf]
